# Supplementary material
Source: publisher figshare collection journal article supplement (https://karger.figshare.com/articles/dataset/_/6133511)
Supplement: Supplementary file 1 [file 1 › PPS487893_sm1.PDF]

## Supplementary material Table S1

### Summary of Treatment Contents

#### First section (sessions 1-4): Introduction and psychoeducation

| Session | CBASP                                                                                                                                                  | CBT-M                                                                                                                                                                                                                                                                                                   | CBT-E                                                                                                                                                                                                                                                                                    |
|---------|--------------------------------------------------------------------------------------------------------------------------------------------------------|---------------------------------------------------------------------------------------------------------------------------------------------------------------------------------------------------------------------------------------------------------------------------------------------------------|------------------------------------------------------------------------------------------------------------------------------------------------------------------------------------------------------------------------------------------------------------------------------------------|
| 1       | Explore individual course and symptoms of depression<br>Address patient's expectations, increase hope, decrease unrealistic expectations               |                                                                                                                                                                                                                                                                                                         |                                                                                                                                                                                                                                                                                          |
| 2       | Develop a model of depression (cause, maintenance, interpersonal learning)<br>Explain goals and contents of CBASP<br>Homework: List significant others | Develop a model of depression (cause, maintenance)<br>Education: Influence of mindfulness exercises on depression<br>Homework: Daily protocol (activity, events, mood)                                                                                                                                  | Develop a model of depression (cause, maintenance)<br>Education: Influence of physical exercise on depression<br>Homework: Daily protocol (activity, events, mood)                                                                                                                       |
| 3       | Significant Other History (start)                                                                                                                      | Discuss last week protocol<br>Education: Biological and psychological effects of pleasurable activities on mood and health, recommendations for mindful activities<br>Therapist-guided preparation of activity plans for weeks 5-8<br>Homework: Self-guided preparation of activity plans for weeks 5-8 | Discuss last week protocol<br>Education: Biological and psychological effects of exercise on mood and health, recommendations for physical activity<br>Therapist-guided preparation of activity plans for weeks 5-8<br>Homework: Self-guided preparation of activity plans for weeks 5-8 |
| 4       | Significant Other History (continuation)<br>Generate a Transference Hypothesis                                                                         | Discuss homework<br>Check understanding for relation of mindfulness activities and mood<br>Increase motivation for mindfulness activities                                                                                                                                                               | Discuss homework<br>Check understanding for relation of physical activity and mood<br>Increase motivation for exercises                                                                                                                                                                  |

|  |  |                                                                                                                                                                                                         |                                                                                                                                                                                                |
|--|--|---------------------------------------------------------------------------------------------------------------------------------------------------------------------------------------------------------|------------------------------------------------------------------------------------------------------------------------------------------------------------------------------------------------|
|  |  | Problem-solving strategies to reduce barriers to mindfulness activities<br>Further therapist-guided preparation of activity plans for weeks 5-8<br><br>Homework: Finishing activity plans for weeks 5-8 | Problem-solving strategies to reduce barriers to physical activity<br>Further therapist-guided preparation of activity plans for weeks 5-8<br>Homework: Finishing activity plans for weeks 5-8 |
|--|--|---------------------------------------------------------------------------------------------------------------------------------------------------------------------------------------------------------|------------------------------------------------------------------------------------------------------------------------------------------------------------------------------------------------|

**Second section (sessions 5-8): Specifics of CBASP Situation Analyses, or resp. behavioral activation in cbt-arms (mindfulness vs. physical exercise)**

| Session | CBASP                                                                                                                                                                                     | CBT-M                                                                                                                                                                                                                                                                              | CBT-E                                                                                                                                                                                              |
|---------|-------------------------------------------------------------------------------------------------------------------------------------------------------------------------------------------|------------------------------------------------------------------------------------------------------------------------------------------------------------------------------------------------------------------------------------------------------------------------------------|----------------------------------------------------------------------------------------------------------------------------------------------------------------------------------------------------|
| 5       | Explain Situation Analyses by a simple interpersonal situation chosen by patient<br>Homework (until end of treatment):<br>Choose an interpersonal situation                               | Evaluation of activity plans<br>Repetition of education<br>Further motivation and, if necessary, problem solving<br><br>First exercise in session: Focus on olfactory sense (with stimuli as lemons, herbs, etc.)                                                                  | Evaluation of activity plans<br>Repetition of education<br>Further motivation and, if necessary, problem solving                                                                                   |
| 6 - 8   | Each session:<br>Situation Analyses<br>In case of “hot spots” (behavior relevant for transference hypotheses): Disciplined Personal Involvement and Interpersonal Discrimination Exercise | Each session:<br>Review last week’s mindfulness exercises<br>Check understanding and compliance<br>Exercise in session: Focus on one sense (haptic, iconic, echoic) per week<br>Further motivation and, if necessary, problem solving<br>Evaluation and adaption of activity plans | Each session:<br>Review last week’s physical exercises<br>Check understanding and compliance<br>Further motivation and, if necessary, problem solving<br>Evaluation and adaption of activity plans |
| 9       |                                                                                                                                                                                           | Resumé 4 weeks of intense focusing on sensory channels                                                                                                                                                                                                                             | Resumé 4 weeks of increased physical activity                                                                                                                                                      |

|  |  |                                                |                                                 |
|--|--|------------------------------------------------|-------------------------------------------------|
|  |  | Motivate for maintenance of mindful activities | Motivate for maintenance of physical activities |
|--|--|------------------------------------------------|-------------------------------------------------|

### Third section (sessions 9-16): Situation analyses, or resp. Cognitive Therapy

| Session | CBASP                                                                                                                                                                                  | CBT-M                                                                                                                                                                                                                                                                                                                            | CBT-E |
|---------|----------------------------------------------------------------------------------------------------------------------------------------------------------------------------------------|----------------------------------------------------------------------------------------------------------------------------------------------------------------------------------------------------------------------------------------------------------------------------------------------------------------------------------|-------|
| 10      | Each session:<br>Situation Analyses<br>Disciplined Personal Involvement<br>Interpersonal Discrimination Exercise<br>In addition, if indicated: Social Skills Training, Problem Solving | Explain connection of feelings and thoughts<br>Introduce “automatic thoughts”<br>Learn about relevance of automatic thoughts by examples of Ellis’ A B C model<br>Identify patient’s characteristic automatic thoughts<br>Homework: A B C analysis<br>Motivate for maintenance of mindful (CBT-M) or physical activities (CBT-E) |       |
| 11      |                                                                                                                                                                                        | Extend model by “disputation” and “effect” to A B C D E<br>First try to discuss and modify automatic thoughts<br>Homework: A B C D E analysis<br>Motivate for maintenance of mindful (CBT-M) or physical activities (CBT-E)                                                                                                      |       |
| 12      |                                                                                                                                                                                        | Further discussion and modification of automatic thoughts<br>Homework: Daily protocol of automatic thoughts<br>Motivate for maintenance of mindful (CBT-M) or physical activities (CBT-E)                                                                                                                                        |       |
| 13      |                                                                                                                                                                                        | Techniques on questioning automatic thoughts, further exercise<br>Techniques on stopping dysfunctional thoughts and rumination<br>Motivate for maintenance of mindful (CBT-M) or physical activities (CBT-E)                                                                                                                     |       |
| 14      |                                                                                                                                                                                        | Identify general beliefs that complicate patient’s life<br>Motivate for maintenance of mindful (CBT-M) or physical activities (CBT-E)                                                                                                                                                                                            |       |
| 15      |                                                                                                                                                                                        | Optimize self-esteem<br>Appraisal of success and failure<br>Motivate for maintenance of mindful (CBT-M) or physical activities (CBT-E)                                                                                                                                                                                           |       |
| 16      | Maintenance of situation analyses / mindfulness / physical activities<br>Relapse prevention                                                                                            |                                                                                                                                                                                                                                                                                                                                  |       |

|  |                                       |
|--|---------------------------------------|
|  | Resumé of helpful elements in therapy |
|--|---------------------------------------|
