# Supplementary material
Source: publisher figshare collection journal article supplement (https://karger.figshare.com/articles/dataset/_/6133511)
Supplement: Supplementary file 1 [file 1 › PPS487893_sm2.PDF]

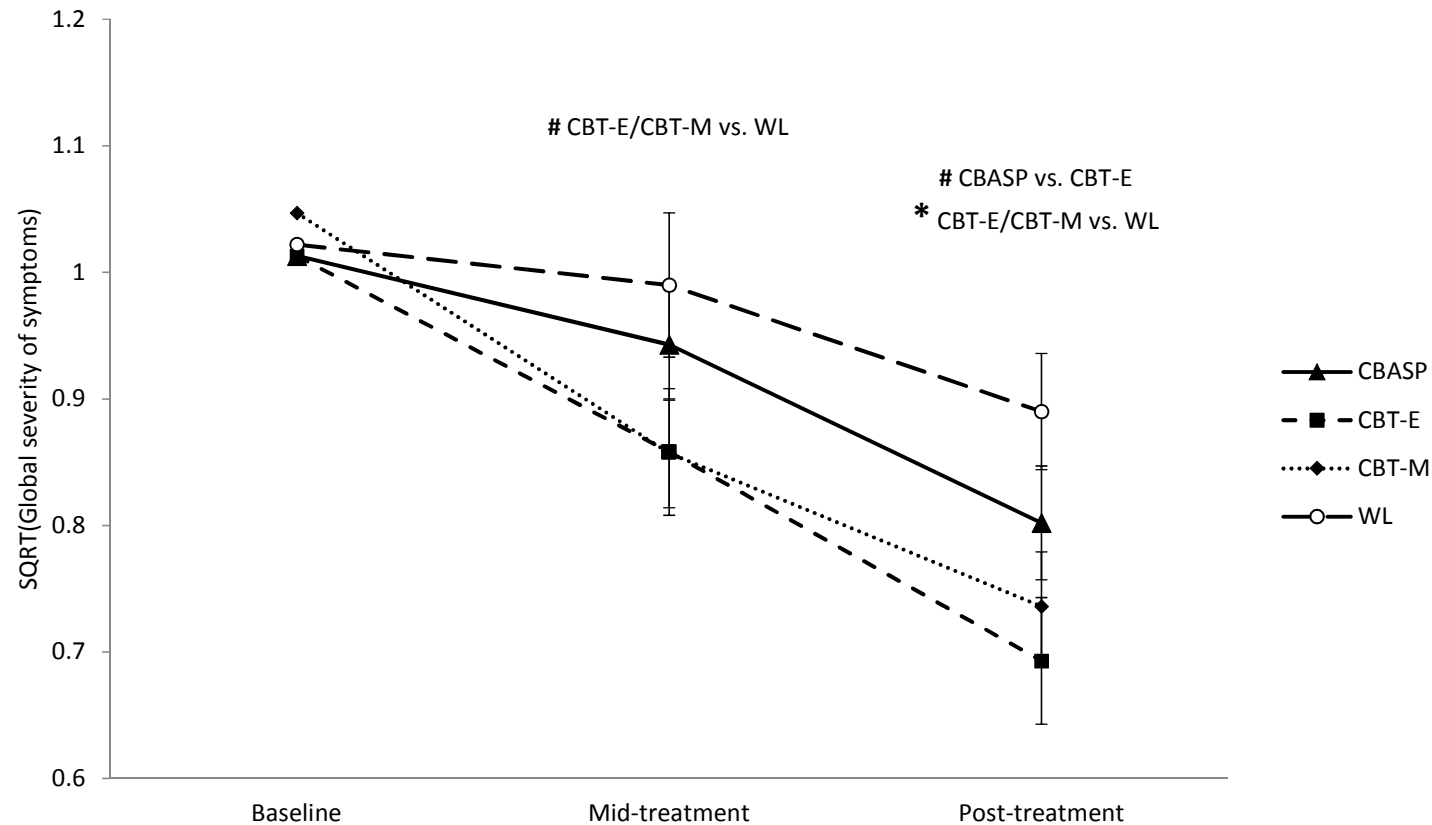

*Supplementary Material:*

*Figure S1.* Global severity of psychopathological symptoms from baseline to week 8 (mid-treatment), and to week 16 (post-treatment) by treatment group. Values are estimated marginal means (SEM) from intend to treat analysis using multilevel modeling. Post-hoc contrasts for cognitive behavioral analysis system (CBASP), cognitive behavioral therapy emphasizing physical exercises during behavioral activation (CBT-E) cognitive behavioral therapy emphasizing mindfulness exercises during behavioral activation (CBT-M) versus waitlist (WL). \*  $p < 0.05$

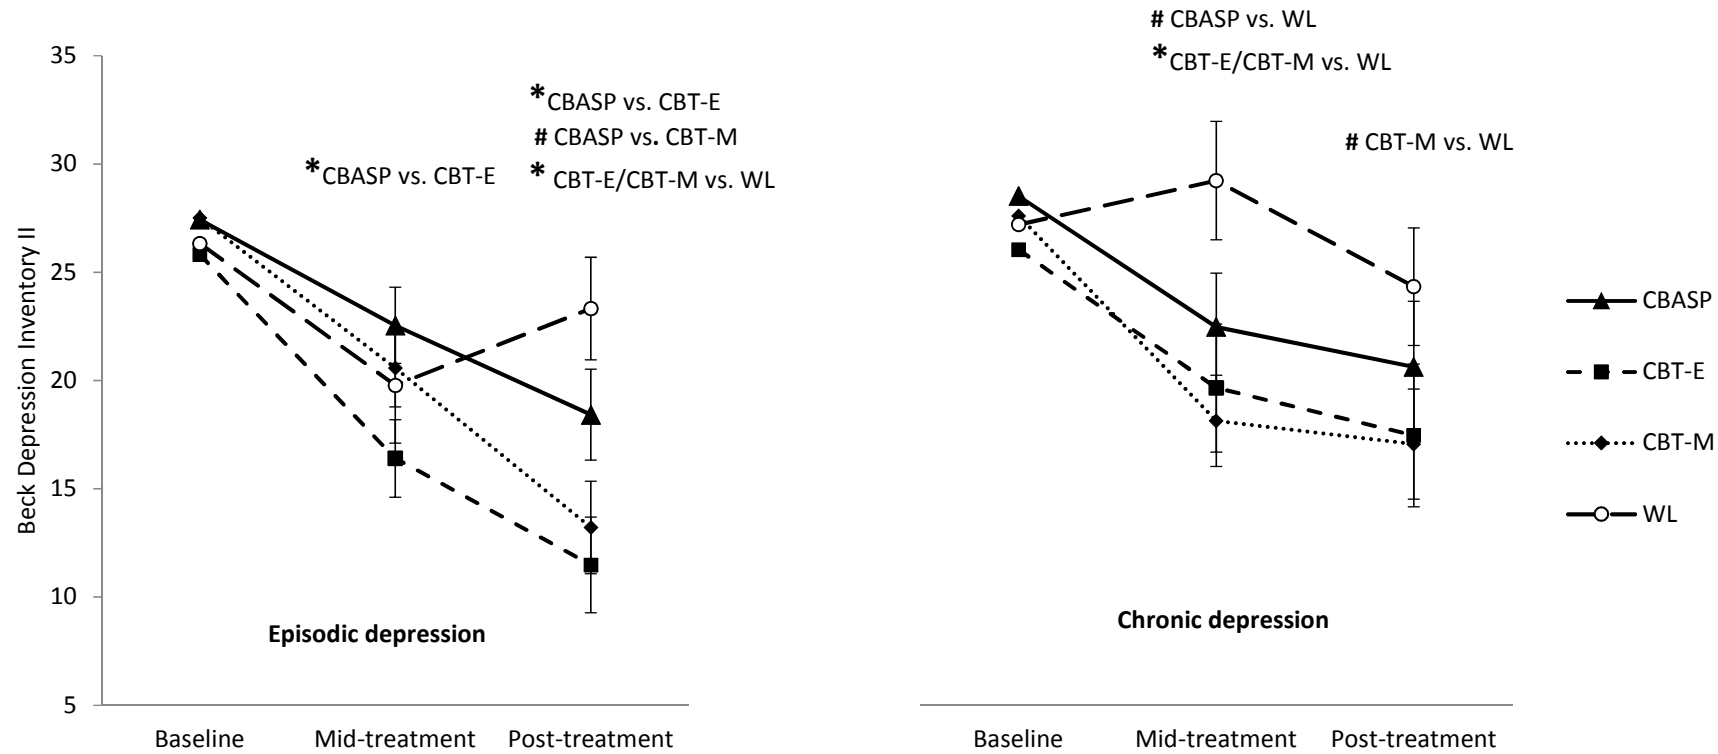

*Supplementary Material:*

*Figure S2.* Depressive symptom severity (adjusted for screening values at study entry) from baseline to week 8 (mid-treatment), and to week 16 (post-treatment) by treatment group, and by chronicity (i.e., persistence of depressive symptoms for at least two years). Values are estimated marginal means (SEM) from intent to treat analysis using multilevel modeling. Post-hoc contrasts for cognitive behavioral analysis system (CBASP), cognitive behavioral therapy emphasizing physical exercises during behavioral activation (CBT-E) cognitive behavioral therapy emphasizing mindfulness exercises during behavioral activation (CBT-M) versus waitlist (WL). \*  $p < 0.05$  #  $p < 0.1$ . Sample sizes for chronic depression vary between 13 (CBASP; CBT-E) and 18 (CBT-M; WL), while sample sizes for episodic depression vary between 24 (WL) and 32 (CBT-A); see Tab. 2.

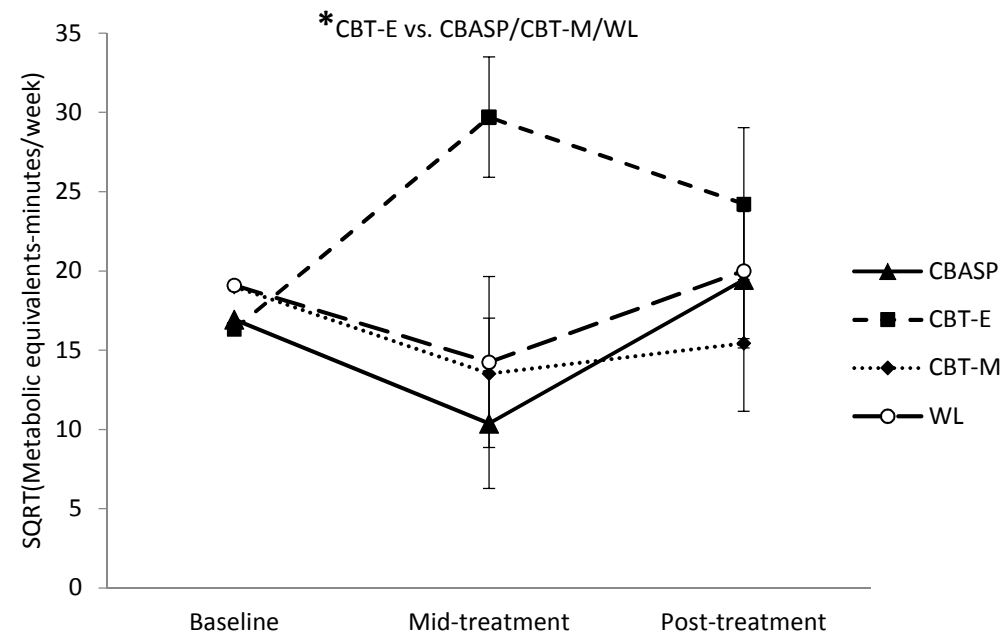

*Supplementary Material:*

*Figure S3.* Intensity of vigorous physical activity from baseline to week 8 (mid-treatment), and to week 16 (post-treatment) by treatment group. Values are estimated marginal means (SEM) from intend to treat analysis using multilevel modeling. Post-hoc contrasts for cognitive behavioral analysis system (CBASP), cognitive behavioral therapy emphasizing physical exercises during behavioral activation (CBT-E) cognitive behavioral therapy emphasizing mindfulness exercises during behavioral activation (CBT-M) versus waitlist (WL). \*  $p < 0.05$

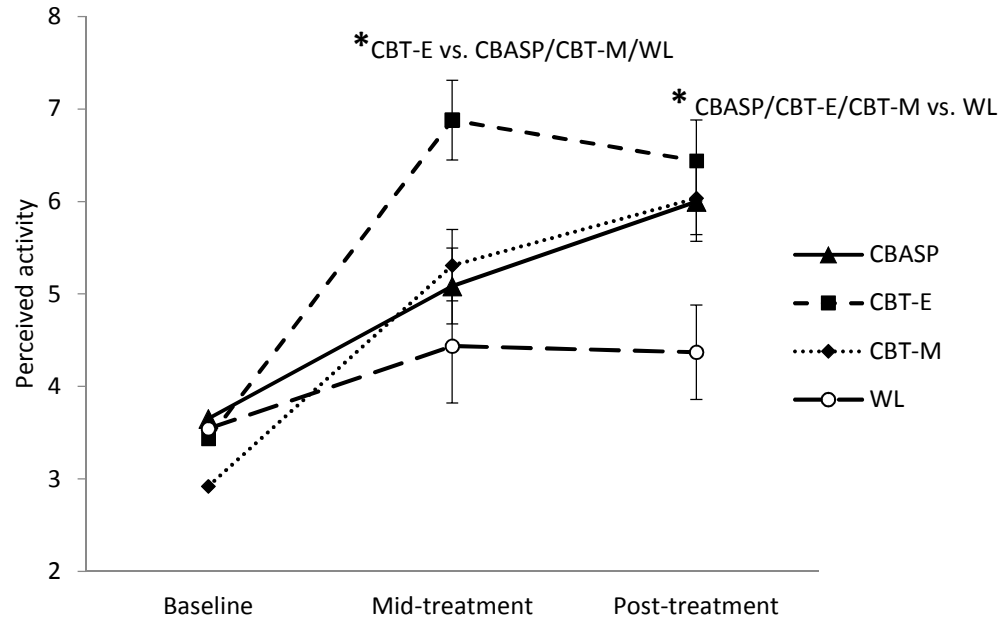

*Supplementary Material:*

*Figure S4.* Intensity of perceived activity (Visual analogue scale) from baseline to week 8 (mid-treatment), and to week 16 (post-treatment) by treatment group. Values are estimated marginal means (SEM) from intend to treat analysis using multilevel modeling. Post-hoc contrasts for cognitive behavioral analysis system (CBASP), cognitive behavioral therapy emphasizing physical exercises during behavioral activation (CBT-E) cognitive behavioral therapy emphasizing mindfulness exercises during behavioral activation (CBT-M) versus waitlist (WL). \*  $p < 0.05$

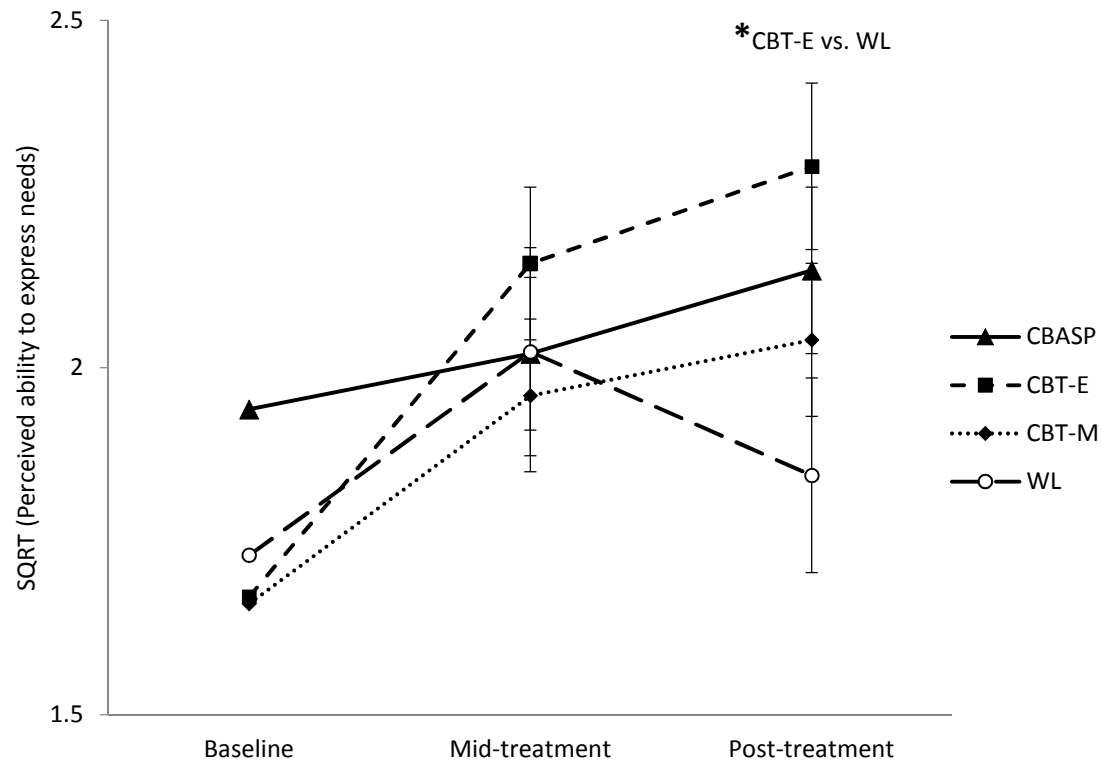

*Supplementary Material:*

*Figure S5.* Intensity of perceived ability to express needs (Visual analogue scale) from baseline to week 8 (mid-treatment), and to week 16 (post-treatment) by treatment group. Values are estimated marginal means (SEM) from intent to treat analysis using multilevel modeling. Post-hoc contrasts for cognitive behavioral analysis system (CBASP), cognitive behavioral therapy emphasizing physical exercises during behavioral activation (CBT-E) cognitive behavioral therapy emphasizing mindfulness exercises during behavioral activation (CBT-M) versus waitlist (WL).

\*  $p < 0.05$

*Supplementary Material:*

Table S2

*Effect Sizes (Cohen's d) for post-hoc contrasts (i.e., differences in estimated marginal means) presented in figures 2, 3, 5-8.*

| <i>Contrast</i> | <i>Figure (outcome)</i> |             |             |         |        |        |       |
|-----------------|-------------------------|-------------|-------------|---------|--------|--------|-------|
|                 | 2 (BDI)                 | 3 (ED, BDI) | 3 (CD, BDI) | 5 (SCL) | 6 (VA) | 7 (PA) | 8 (N) |
| Mid-treatment   |                         |             |             |         |        |        |       |
| CBASP vs. CBT-E | 0.42                    | 0.66        | 0.28        | 0.29    | 0.79   | 0.65   | 0.18  |
| CBASP vs. CBT-M | 0.27                    | 0.21        | 0.48        | 0.30    | 0.13   | 0.09   | 0.08  |
| CBASP vs. WL    | 0.25                    | 0.25        | 0.64        | 0.15    | 0.13   | 0.19   | 0.004 |
| CBT-E vs. CBT-M | 0.16                    | 0.46        | 0.16        | 0.003   | 0.67   | 0.58   | 0.26  |
| CBT-E vs. WL    | 0.60                    | 0.31        | 0.85        | 0.39    | 0.51   | 0.71   | 0.15  |
| CBT-M vs. WL    | 0.48                    | 0.07        | 1.07        | 0.41    | 0.02   | 0.26   | 0.07  |
| Post-treatment  |                         |             |             |         |        |        |       |
| CBASP vs. CBT-E | 0.46                    | 0.62        | 0.28        | 0.36    | 0.16   | 0.15   | 0.19  |
| CBASP vs. CBT-M | 0.40                    | 0.48        | 0.33        | 0.23    | 0.14   | 0.01   | 0.13  |
| CBASP vs. WL    | 0.47                    | 0.43        | 0.33        | 0.30    | 0.02   | 0.56   | 0.35  |
| CBT-E vs. CBT-M | 0.09                    | 0.16        | 0.04        | 0.15    | 0.29   | 0.15   | 0.33  |
| CBT-E vs. WL    | 0.91                    | 1.04        | 0.59        | 0.65    | 0.14   | 0.66   | 0.52  |
| CBT-M vs. WL    | 0.87                    | 0.94        | 0.65        | 0.52    | 0.16   | 0.56   | 0.24  |

*Note.* BDI = Beck Depression Inventory; CBASP = cognitive behavioral analysis system of psychotherapy; CBT-E = cognitive behavioral therapy emphasizing physical exercises during behavioral activation; CBT-M = cognitive behavioral therapy emphasizing mindfulness exercises during behavioral activation; CD = chronic depression; ED = episodic depression; N = perceived ability to express needs; PA = perceived activity; SCL = Symptom checklist (general psychopathology); VA = vigorous physical activity; WL = waitlist control condition.

*Supplementary Material:*

Table S3

*Characteristics of patients with episodic versus chronic major depression.*

| <i>Characteristic</i>                                    | <i>Episodic<br/>Depression</i> | <i>Chronic<br/>Depression</i> | <i>p-value</i>      |
|----------------------------------------------------------|--------------------------------|-------------------------------|---------------------|
| Age, <i>M (SD)</i>                                       | 37.47 (12.0)                   | 37.6 (12.1)                   | .96 <sup>d</sup>    |
| Female, <i>n (%)</i>                                     | 68 (67.3)                      | 22 (35.5)                     | < .001 <sup>e</sup> |
| BDI-II: Depressive symptom severity at screening         | 28.71 (9.10)                   | 28.80 (8.27)                  | .94 <sup>d</sup>    |
| Upper secondary education <sup>a</sup> , <i>n (%)</i>    | 45 (44.6)                      | 31 (50.0)                     | .30 <sup>e</sup>    |
| Early onset major depression <sup>b</sup> , <i>n (%)</i> | 27 (26.7)                      | 29 (46.8)                     | .01 <sup>e</sup>    |
| Antidepressant medication, <i>n (%)</i>                  | 41 (40.6)                      | 26 (41.9)                     | .87 <sup>e</sup>    |
| DSM-IV axis I comorbidity                                |                                |                               |                     |
| Anxiety disorders, <i>n (%)</i>                          | 27 (26.7)                      | 14 (22.6)                     | .55 <sup>e</sup>    |
| Somatoform disorders, <i>n (%)</i>                       | 16 (15.8)                      | 9 (14.5)                      | .82 <sup>e</sup>    |
| CTQ: Childhood trauma                                    |                                |                               |                     |
| At least one trauma, <i>n (%)</i>                        | 71 (70.3)                      | 42 (67.7)                     | .63 <sup>e</sup>    |
| Emotional abuse, <i>n (%)</i>                            | 22 (21.8)                      | 17 (27.4)                     | .44 <sup>e</sup>    |
| Physical abuse, <i>n (%)</i>                             | 13 (12.9)                      | 3 (4.8)                       | .09 <sup>e</sup>    |
| Sexual abuse, <i>n (%)</i>                               | 9 (8.9)                        | 5 (8.1)                       | .83 <sup>e</sup>    |
| Emotional neglect, <i>n (%)</i>                          | 50 (49.5)                      | 23 (37.1)                     | .09 <sup>e</sup>    |
| Physical neglect, <i>n (%)</i>                           | 17 (16.8)                      | 18 (29.0)                     | .07 <sup>e</sup>    |

*Note.* BDI = Beck Depression Inventory; CTQ = Childhood Trauma Questionnaire. <sup>a</sup> School education of at least level 3 according to the International Standard Classification of Education. <sup>b</sup> Age of onset of less than 21. <sup>d</sup> By t-tests. <sup>e</sup> By  $\chi^2$  test.
